# Supplementary material for: Human Papillomavirus 16 E6 Suppresses Transporter Associated with Antigen-Processing Complex in Human Tongue Keratinocyte Cells by Activating Lymphotoxin Pathway
Source: MDPI journal article supplement (doi:10.3390/cancers14081944), 2022-04-12
Supplement: s1 [file s1]

**Supplementary Table S1** Clinico-demographic information of OSCC specimens.

| Characteristic            | Number with each characteristic | HPV positive (%) |
|---------------------------|---------------------------------|------------------|
| <b>Gender</b>             |                                 |                  |
| Male, M                   | 53                              | 29 (54.7%)       |
| Female, F                 | 95                              | 55 (57.9%)       |
| <b>Age, year</b>          |                                 |                  |
| ≤ 50                      | 25                              | 14 (56.0%)       |
| 51-64                     | 34                              | 18 (52.9%)       |
| ≥ 65                      | 89                              | 52 (58.4%)       |
| <b>Histology grading</b>  |                                 |                  |
| Well                      | 97                              | 58 (59.8%)       |
| Moderately                | 38                              | 18 (47.4%)       |
| Poorly                    | 5                               | 2 (40.0%)        |
| Other                     | 8                               | 6 (75.0%)        |
| <b>Anatomical subsite</b> |                                 |                  |
| Buccal mucosa             | 70                              | 39 (55.7%)       |
| Tongue                    | 20                              | 17 (85.0%)       |
| Lip                       | 16                              | 13 (81.2%)       |
| Palate                    | 18                              | 7 (38.8%)        |
| Others                    | 24                              | 8 (33.3%)        |

**Supplementary Table S2** List of human tongue keratinocytes (HTK) and OSCC cells lines.

| Name                                 | Origin                      | Refs.                   |
|--------------------------------------|-----------------------------|-------------------------|
| HTK1 K4DT-pCLXSN-18E6E7              | Human tongue keratinocyte   | Zushi et. al., 2011     |
| HTK1 K4DT-pCLXSN-16E6E7              | Human tongue keratinocyte   |                         |
| HTK1 K4DT-pCLXSN-16E6SD              | Human tongue keratinocyte   |                         |
| HTK1 K4DT-pCLXSN-16E7                | Human tongue keratinocyte   |                         |
| HTK1 K4DT-pCLXSN                     | Human tongue keratinocyte   |                         |
| HTK1K4DT-pSI-MSCV-CLXPpuro-H1R-p53Ri | Human tongue keratinocyte   | Kondo et. al., 1981     |
| HSC1                                 | Oral cavity                 |                         |
| HSC2                                 | Oral cavity: floor of mouth |                         |
| HSC3                                 | Tongue                      |                         |
| SCCKN                                | Tongue                      |                         |
| SCC90 (HPV16 <sup>+</sup> cells)     | Tongue                      | Momose et. al., 1989    |
| SCC25                                | Tongue                      | Momose et. al., 1989    |
| SCCTH                                | Oral cavity                 | Urade et. al., 1992     |
| UM-SCC-14A                           | Oral cavity: floor of mouth | White et. al., 2007     |
|                                      |                             | Rheinwald et. al., 1981 |
|                                      |                             | White et. al., 2007     |
|                                      |                             | Baker et. al., 1985     |

**References:**

1. Zushi, Y., Narisawa-Saito, M., Noguchi, K., Yoshimatsu, Y., Yugawa, T., Egawa, N., Fujita, M., Urade, M., & Kiyono, T. (2011). An in vitro multistep carcinogenesis model for both HPV-positive and -negative human oral squamous cell carcinomas. *American journal of cancer research*, 1(7), 869–881.
2. Kondo, S., & Aso, K. (1981). Establishment of a cell line of human skin squamous cell carcinoma in vitro. *The British journal of dermatology*, 105(2), 125–132. <https://doi.org/10.1111/j.1365-2133.1981.tb01196.x>

3. Momose, F., Araida, T., Negishi, A., Ichijo, H., Shioda, S., & Sasaki, S. (1989). Variant sublines with different metastatic potentials selected in nude mice from human oral squamous cell carcinomas. *Journal of oral pathology & medicine : official publication of the International Association of Oral Pathologists and the American Academy of Oral Pathology*, 18(7), 391–395.  
<https://doi.org/10.1111/j.1600-0714.1989.tb01570.x>
4. Urade, M., Ogura, T., Mima, T., & Matsuya, T. (1992). Establishment of human squamous carcinoma cell lines highly and minimally sensitive to bleomycin and analysis of factors involved in the sensitivity. *Cancer*, 69(10), 2589–2597.  
[https://doi.org/10.1002/1097-0142\(19920515\)69:10<2589::aid-cncr2820691032>3.0.co;2-y](https://doi.org/10.1002/1097-0142(19920515)69:10<2589::aid-cncr2820691032>3.0.co;2-y)
5. White, J. S., Weissfeld, J. L., Ragin, C. C., Rossie, K. M., Martin, C. L., Shuster, M., Ishwad, C. S., Law, J. C., Myers, E. N., Johnson, J. T., & Gollin, S. M. (2007). The influence of clinical and demographic risk factors on the establishment of head and neck squamous cell carcinoma cell lines. *Oral oncology*, 43(7), 701–712. <https://doi.org/10.1016/j.oraloncology.2006.09.001>
6. Rheinwald, J. G., & Beckett, M. A. (1981). Tumorigenic keratinocyte lines requiring anchorage and fibroblast support cultured from human squamous cell carcinomas. *Cancer research*, 41(5), 1657–1663.
7. Baker S. R. (1985). An in vivo model for squamous cell carcinoma of the head and neck. *The Laryngoscope*, 95(1), 43–56.  
<https://doi.org/10.1288/00005537-198501000-00012>

**Supplementary Table S3** Oligonucleotides used for PCR and qRT-PCR detection.

|                                       | Name    | Sequence (5'→3')           | Amplicon size (bp) |
|---------------------------------------|---------|----------------------------|--------------------|
| <i>HPV L1</i>                         | GP5+    | TTTGTTACTGTGGTAGATACTAC    | 150                |
|                                       | GP6+    | GAAAAATAAACTGTAAATCATATTC  |                    |
| <i>HPV16E6</i>                        | Forward | GTTACTGCGACGTGAGGTATATG    | 94                 |
|                                       | Reverse | ATTTATCACATACAGCATATGGATTC |                    |
| <i>HPV18E6</i>                        | Forward | CAGAGGTATTTGAATTTGCATT     | 85                 |
|                                       | Reverse | AATCTATACATTTATGGCATGCAG   |                    |
| <i>LT<math>\alpha_1\beta_2</math></i> | Forward | AGCCACTTCTCTGGTGACCT       | 106                |
|                                       | Reverse | GTCGGCCGTCTCCGTTAC         |                    |
| <i>TAP1</i>                           | Forward | CGTCCACCCTGAGTGATTCT       | 103                |
|                                       | Reverse | GCACTGATCCCCAGAGCAT        |                    |
| <i>TAP2</i>                           | Forward | AGGAGGCTGCTTCACCTACA       | 124                |
|                                       | Reverse | TGAGTTCAGCTCCCCTGTCT       |                    |
| <i>GAPDH</i>                          | Forward | TCATCAGCAATGCCTCCTGCA      | 117                |
|                                       | Reverse | TGGGTGGCAGTGATGGCA         |                    |

**Supplementary Table S4** The information of antibodies.

| Targets                       | Host              | React with | REF.                                 |
|-------------------------------|-------------------|------------|--------------------------------------|
| MHC I W6/32<br>(HLA IA, B, C) | Mouse monoclonal  | Human      | Santa Cruz Biotechnology (sc-32235)  |
| LT $\alpha_1\beta_2$          | Rabbit polyclonal | Human      | Abcam (ab64835)                      |
| LT $\beta$ R                  | Rabbit polyclonal | Human      | Abcam (ab70063)                      |
| TAP1(B-8)                     | Mouse monoclonal  | Human      | Santa Cruz Biotechnology (sc-376796) |
| TAP2 (2.17)                   | Mouse monoclonal  | Human      | MBL Life science                     |
| HPV16 E6 (46A4)               | Mouse monoclonal  | Human      | In house production                  |
| TP53                          | Mouse monoclonal  | Human      | Calbiochem (OP-43)                   |

**Supplementary Table S5** Oligonucleotide sequences for shRNAs

| Target                                | Sequence (5'→3')                                                     |
|---------------------------------------|----------------------------------------------------------------------|
| <b>shLTβR</b>                         |                                                                      |
| 3913_LTBRRi2_S                        | GATCCCCGCCCAAGGAACCAATTTATTTCAAGAGAATAAATTGGTTCCTTGGGCTTTTTGGAAA     |
| 3914_LTBRRi2_AS                       | AGCTTTTCCAAAAAGCCCAAGGAACCAATTTATTCTCTTGAAATAAATTGGTTCCTTGGGCGGG     |
| 3915_LTBRRi3_S                        | GATCCCCGCAGGGCACTTCCAGAATATTCAAGAGATATTCTGGAAGTGCCCTGCTTTTTGGAAA     |
| 3916_LTBRRi3_AS                       | AGCTTTTCCAAAAAGCAGGGCACTTCCAGAATATCTCTTGAATATTCTGGAAGTGCCCTGCGGG     |
| 3917_LTBRRi4_S                        | GATCCCCGGCACAGAAGCCGAGGTCACATTCAAGAGATGTGACCTCGGCTTCTGTGCCTTTTTGGAAA |
| 3918_LTBRRi4_AS                       | AGCTTTTCCAAAAAGGCACAGAAGCCGAGGTCACATCTCTTGAATGTGACCTCGGCTTCTGTGCCGGG |
| <b>shLTα<sub>1</sub>β<sub>2</sub></b> |                                                                      |
| 3919_LTBRI1_S                         | GATCCCCGGCCTCTATTACCTCTACTTTCAAGAGAAGTAGAGGTAATAGAGGCCTTTTTGGAAA     |
| 3920_LTBRI1_AS                        | AGCTTTTCCAAAAAGGCCTCTATTACCTCTACTTCTCTTGAAAGTAGAGGTAATAGAGGCCGGG     |
| 3921_LTBRI2_S                         | GATCCCCGCCTCTATTACCTCTACTGTTCAAGAGACAGTAGAGGTAATAGAGGCTTTTTGGAAA     |
| 3922_LTBRI2_AS                        | AGCTTTTCCAAAAAGCCTCTATTACCTCTACTGTCTCTTGAAACAGTAGAGGTAATAGAGGCCGGG   |
| 3923_LTBRI3_S                         | GATCCCCGAGAGGGAAGACCTTCTTTTCAAGAGAAAAGAAGGTCTTCCCTCTCTTTTTGGAAA      |
| 3924_LTBRI3_AS                        | AGCTTTTCCAAAAAGAGAGGGAAGACCTTCTTTTCTCTTGAAAAAGAAGGTCTTCCCTCTCGGG     |
| <b>siHPV16E6</b>                      |                                                                      |
| #1_16E6 (211-236) _S                  | GAUAAAUGUUUAAAGUUUUAUUCTA                                            |
| #1_16E6 (211-236) _AS                 | UAGAAUAAAACUUUAAACAUUUUAUCAC                                         |
| #2_16E6 (432-457) _S                  | GUCUUGUUGCAGAUCAUCAAGAACA                                            |
| #2_16E6 (432-457) _AS                 | UGUUCUUGAUGAUCUGCAACAAGACAU                                          |
