# Supplementary material for: Human Papillomavirus 16 E6 Suppresses Transporter Associated with Antigen-Processing Complex in Human Tongue Keratinocyte Cells by Activating Lymphotoxin Pathway
Source: MDPI journal article supplement (doi:10.3390/cancers14081944), 2022-04-12

Supplementary Figure S1: **The expression of genes involved in MHC-I dependent antigen presentation in HNSCC cohort. (A and B)** The expression of genes involved in MHC-I heavy chain (A), and other genes MHC-I dependent antigen presentation (B) for OSCC and normal tissues. \*\*\*  $p \leq 0.001$ ; ns— not significant.

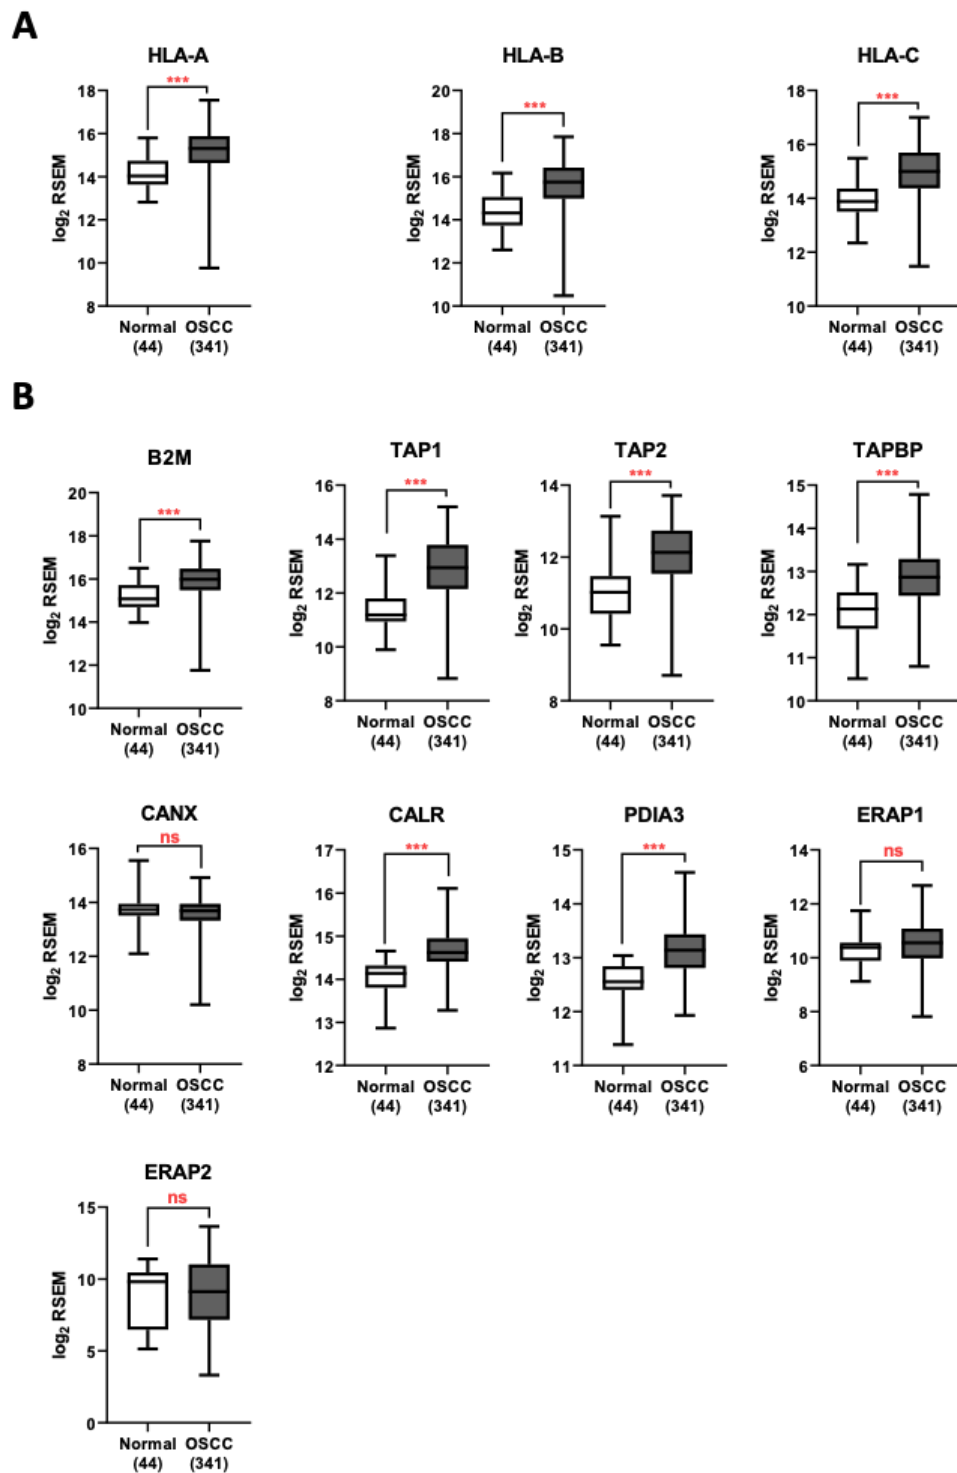

**Supplementary Figure S2: The expression of HPV16E6 in HTK1-K4DT and SCC90.**

(A) The level of HPV16E6 after lentiviral transduction in HTK1-K4DT. (B) The efficiency of HPV16E6-specific siRNA measured by qRT-PCR. All experiments were carried out in triplicate, and at least three independent experiments were performed.

\*  $p \leq 0.05$ ; \*\*  $p \leq 0.01$ ; \*\*\*  $p \leq 0.001$ ; ns—not significant.

**A**

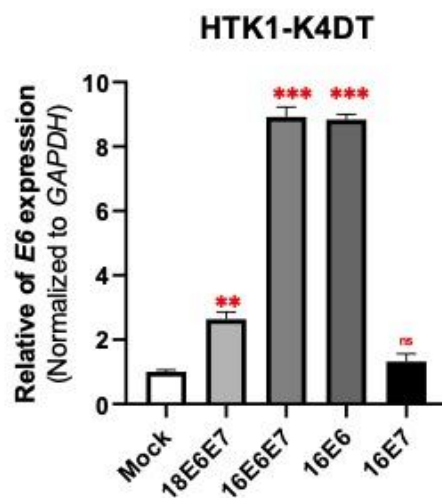

**B**

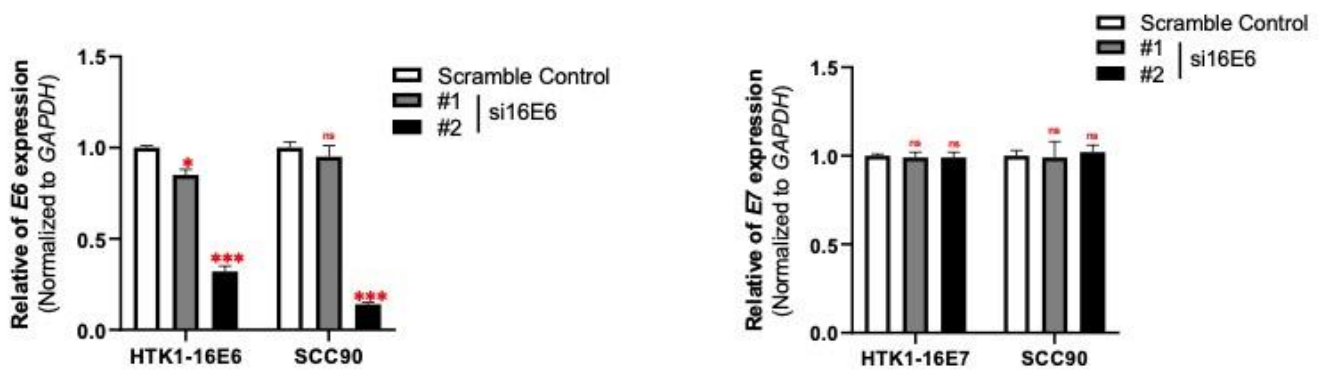

**Supplementary Figure S3: Original western blotting.** The level of indicated protein expression in (A) Figure 1D, (B) Figure 3B, (C) Figure 3E, (D) Figure 5B and 5D, (E). Figure 5G.

**A**

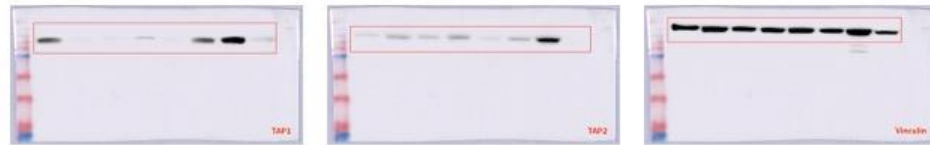

**B**

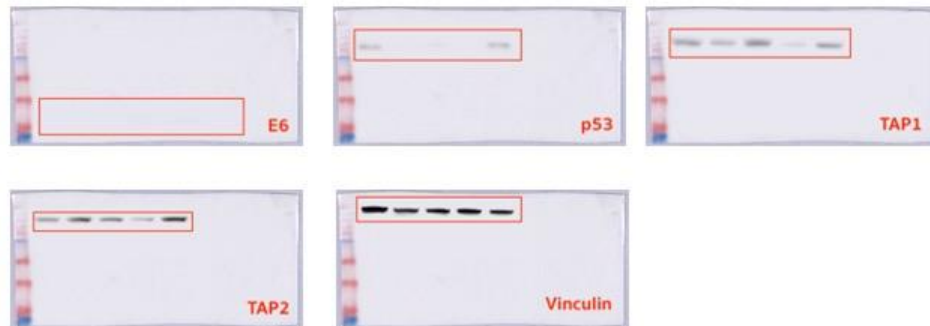

**C**

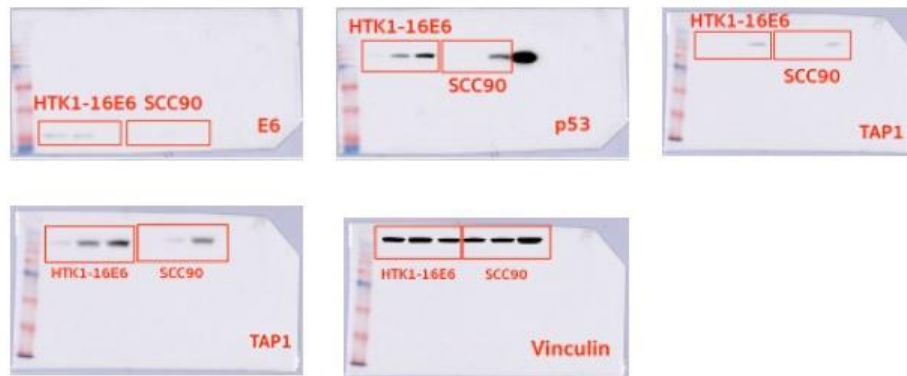

**D**

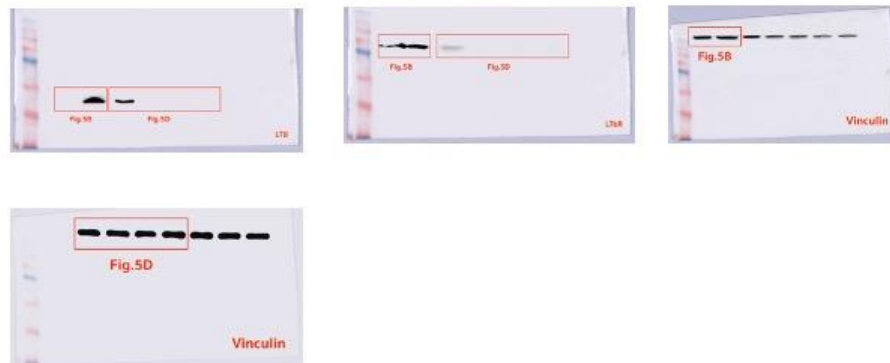

**E**

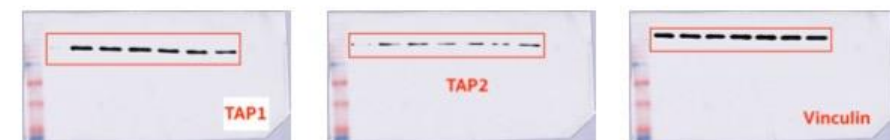

Supplement: s1 [file s1]
